# Supplementary material for: Targeted Metabolomics Study on the Effect of Vinegar Processing on the Chemical Changes and Antioxidant Activity of Angelica sinensis
Source: MDPI journal article supplement (doi:10.3390/antiox12122053), 2023-11-28
Supplement: s1 [file s1]

## Supporting information

| No.       | Content                                                                                                                                                                                                                                                                       |
|-----------|-------------------------------------------------------------------------------------------------------------------------------------------------------------------------------------------------------------------------------------------------------------------------------|
| Figure S1 | TIC overlaps of quality control samples and XIC of multi-peak detection plots of metabolites. TIC by mass spectrometry detection (A, B) and XIC in the MRM mode (C, D). A and C were acquired in positive ionization mode. B and D were acquired in negative ionization mode. |
| Figure S2 | PCA scores plot of quality spectrum data in each group.                                                                                                                                                                                                                       |
| Figure S3 | Score plot, S-plot, and verification diagram of OPLS-DA. OPLS-DA score plot (A), OPLS-DA S-plot (B), and OPLS-DA verification diagram (C) of different groups.                                                                                                                |
| Figure S4 | The relative contents of the typical compounds in A, S-A, and V-A.                                                                                                                                                                                                            |
| Figure S5 | Plots of clustering heatmaps, dynamic distribution, and radar map analysis between A and S-A. Clustering heatmaps (A), dynamic distribution (B), and radar map (C).                                                                                                           |
| Figure S6 | Plots of clustering heatmaps, dynamic distribution, and radar map analysis between A and V-A. Clustering heatmaps (A), dynamic distribution (B), and radar map (C).                                                                                                           |
| Figure S7 | Cluster heat map analysis of various differential compounds.                                                                                                                                                                                                                  |
| Table S1  | Sample information collection sheet. <i>A. Sinensis</i> sample number, plant Origin, Site of Tissue, processed sample and group.                                                                                                                                              |
| Table S2  | 83 differential compounds of <i>A. sinensis</i> during processing.                                                                                                                                                                                                            |
| Table S3  | Grey correlation degree analysis. Grey correlation degree analysis between differential components and antioxidant activity of <i>A. sinensis</i> and its processed products.                                                                                                 |

**Figure S1. TIC overlaps of quality control samples and XIC of multi-peak detection plots of metabolites. TIC by mass spectrometry detection (A, B) and XIC in the MRM mode (C, D). A and C were acquired in positive ionization mode. B and D were acquired in negative ionization mode.**

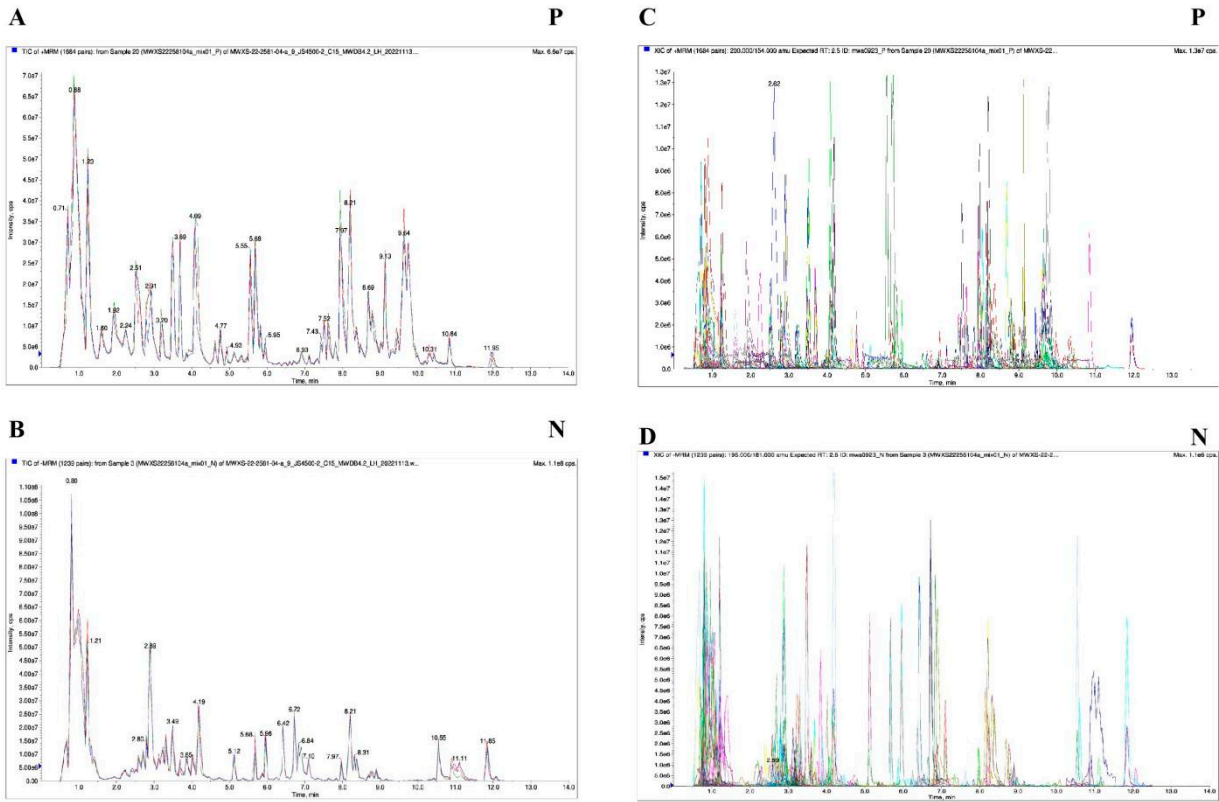

Figure S2. PCA scores plot of quality spectrum data.

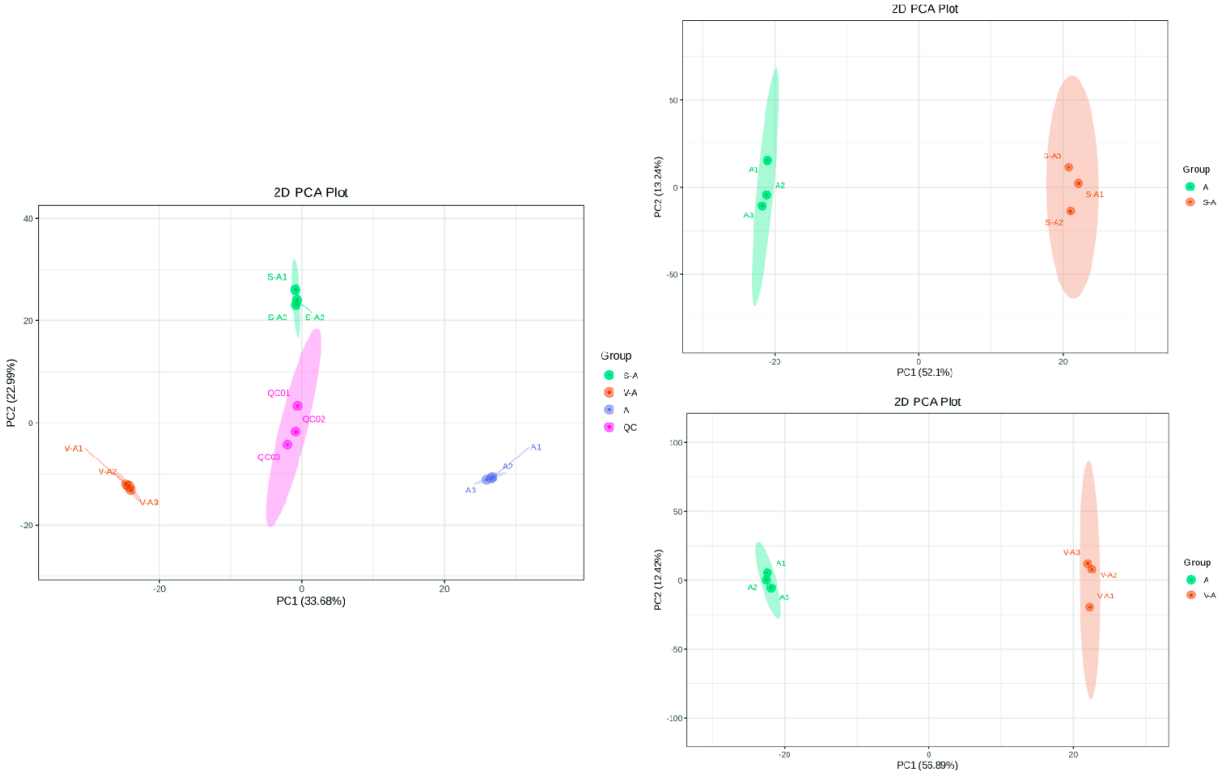

**Figure S3. Score plot, S-plot, and verification diagram of OPLS-DA. OPLS-DA score plot (A), OPLS-DA S-plot (B), and OPLS-DA verification diagram (C) of different groups.**

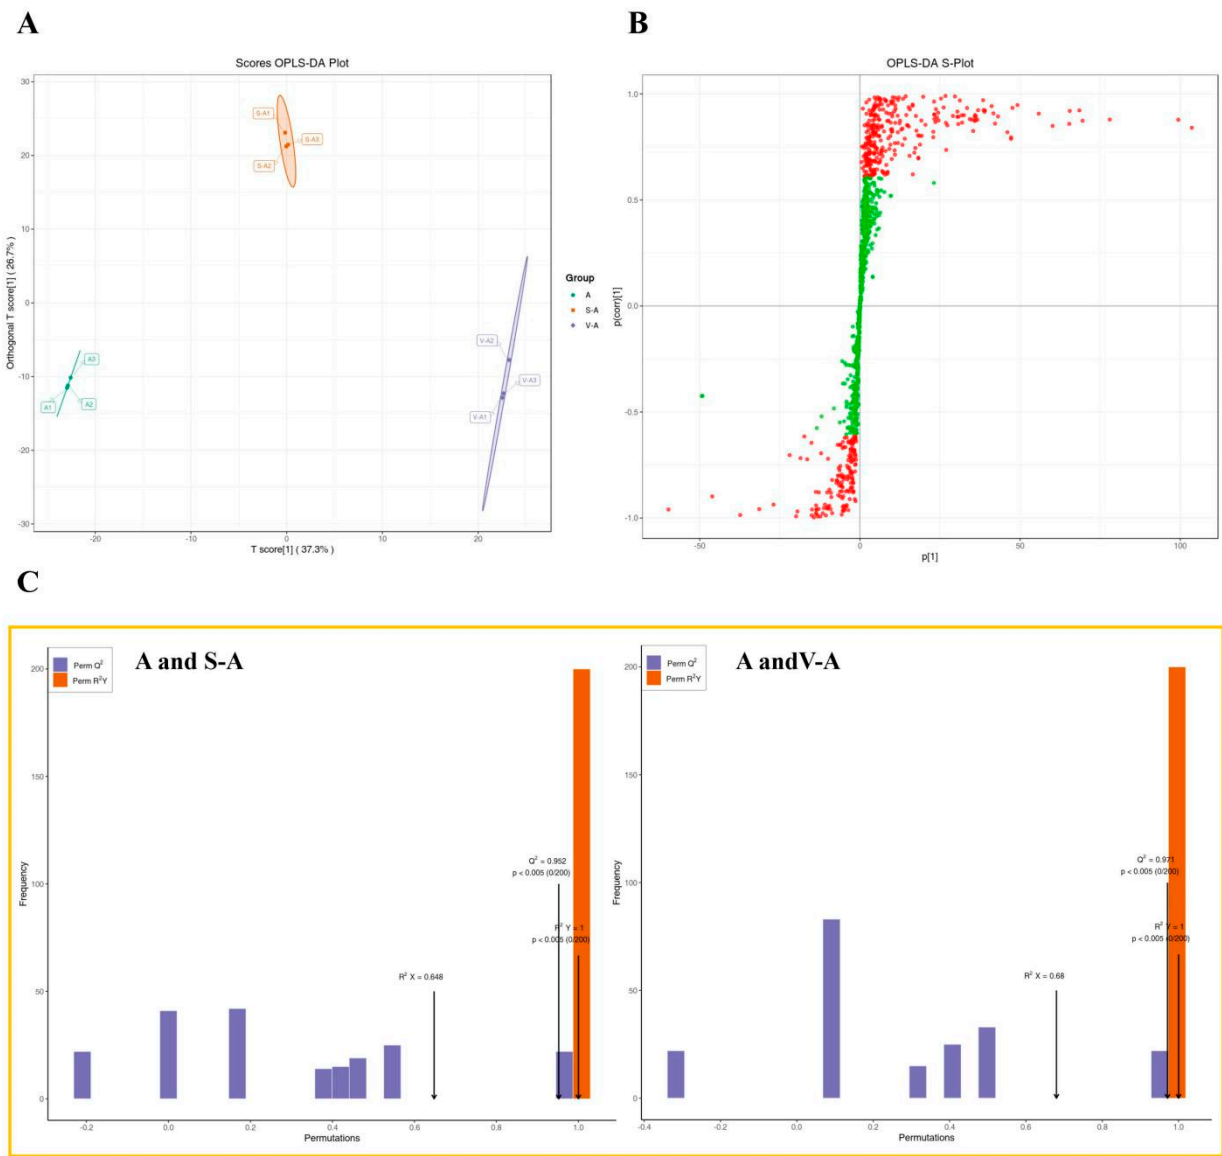

**Figure S4. The relative contents of the typical compounds in A, S-A, and V-A..**

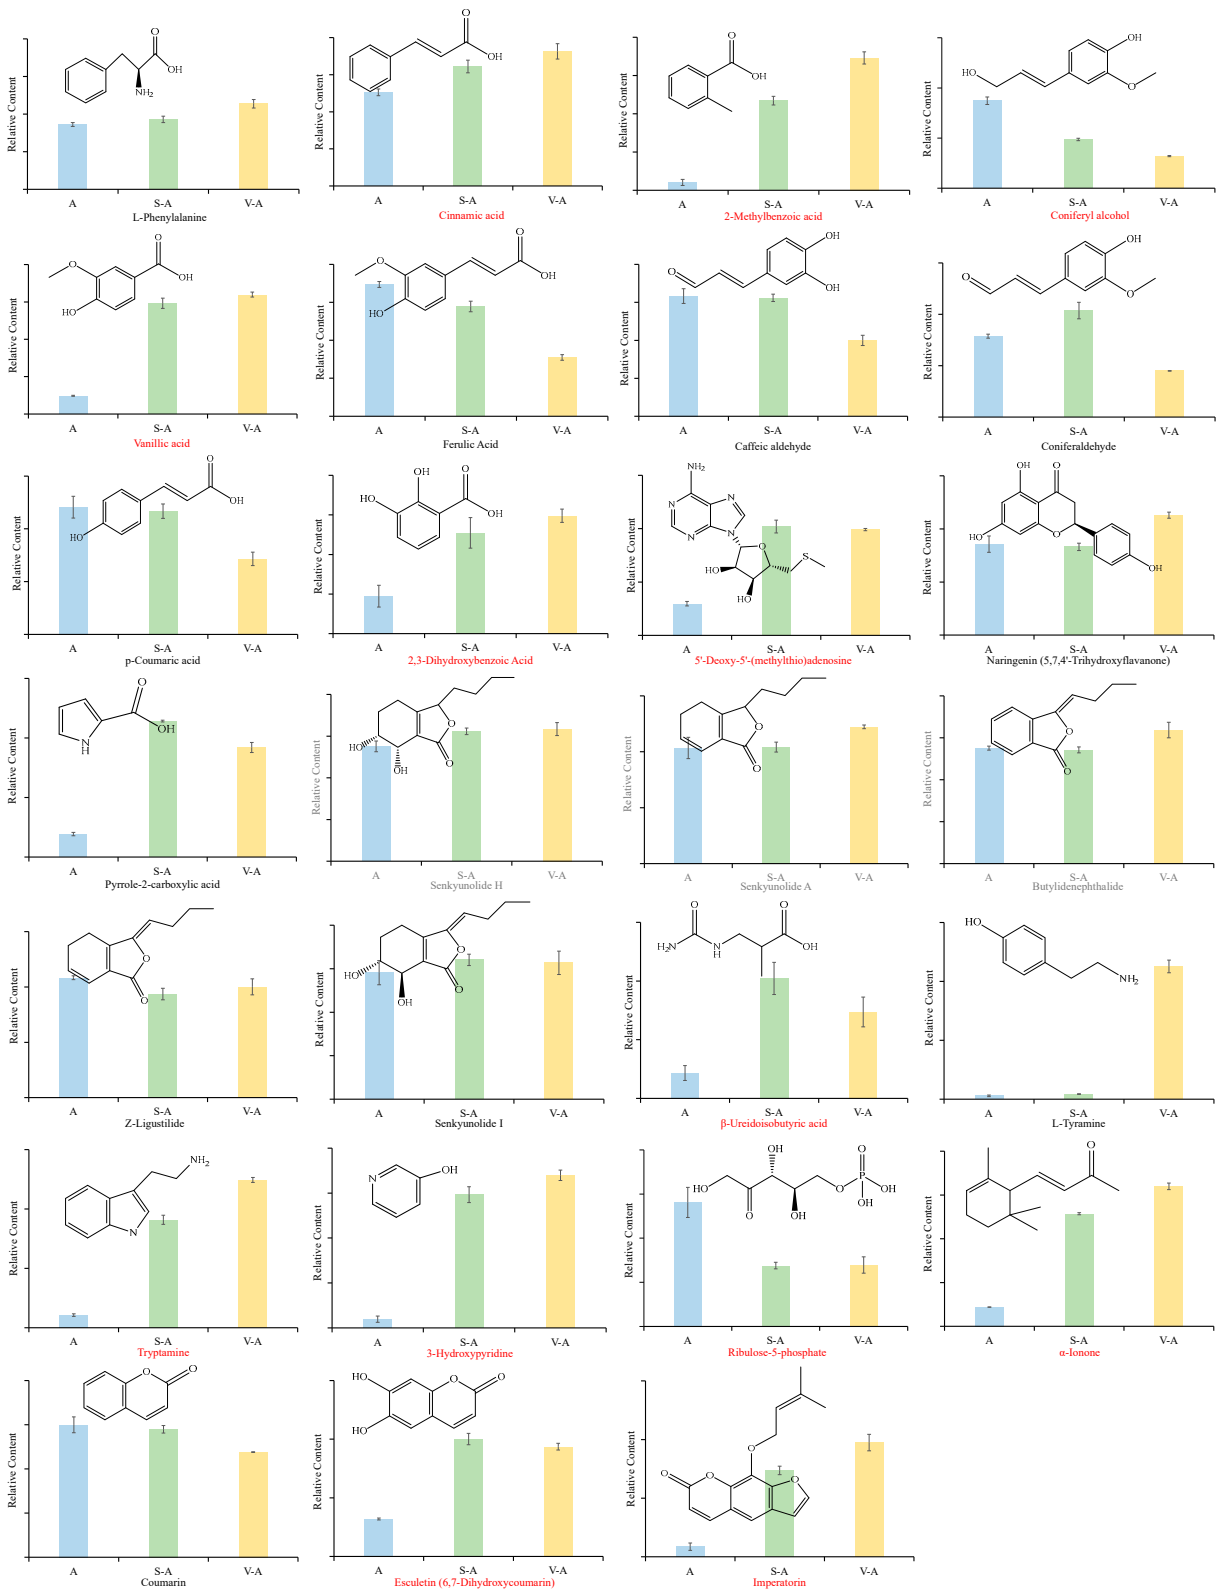

**Figure S5. Plots of clustering heatmaps, dynamic distribution, and radar map analysis between A and S-A. Clustering heatmaps (A), dynamic distribution (B), and radar map (C)..**

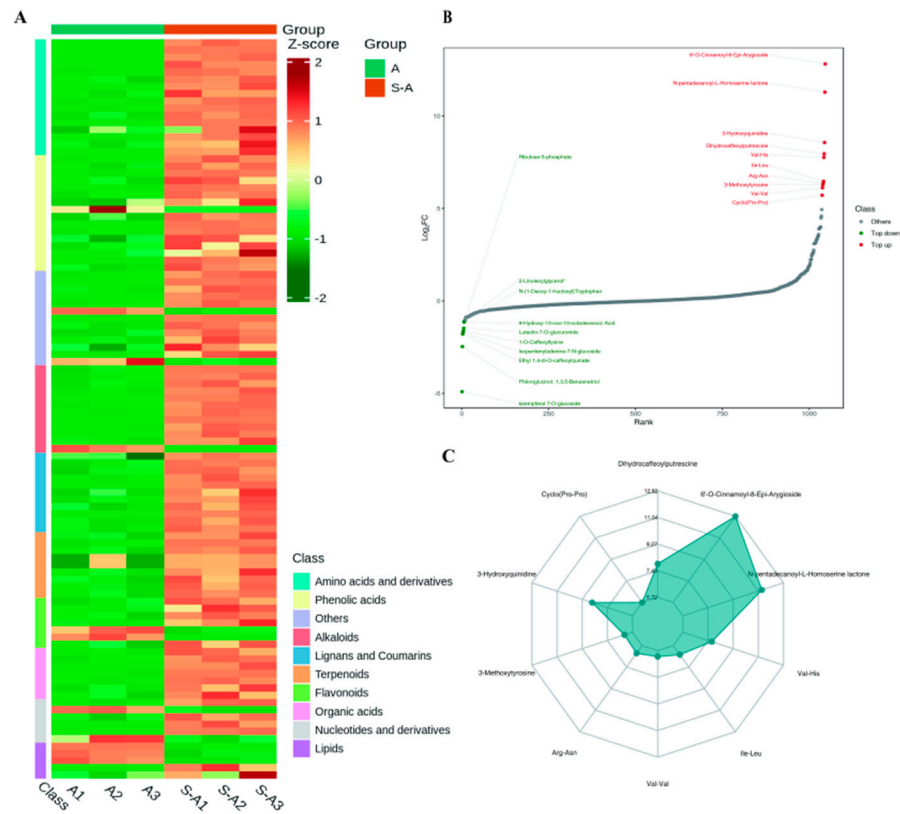

**Figure S6. Plots of clustering heatmaps, dynamic distribution, and radar map analysis between A and V-A. Clustering heatmaps (A), dynamic distribution (B), and radar map (C).**

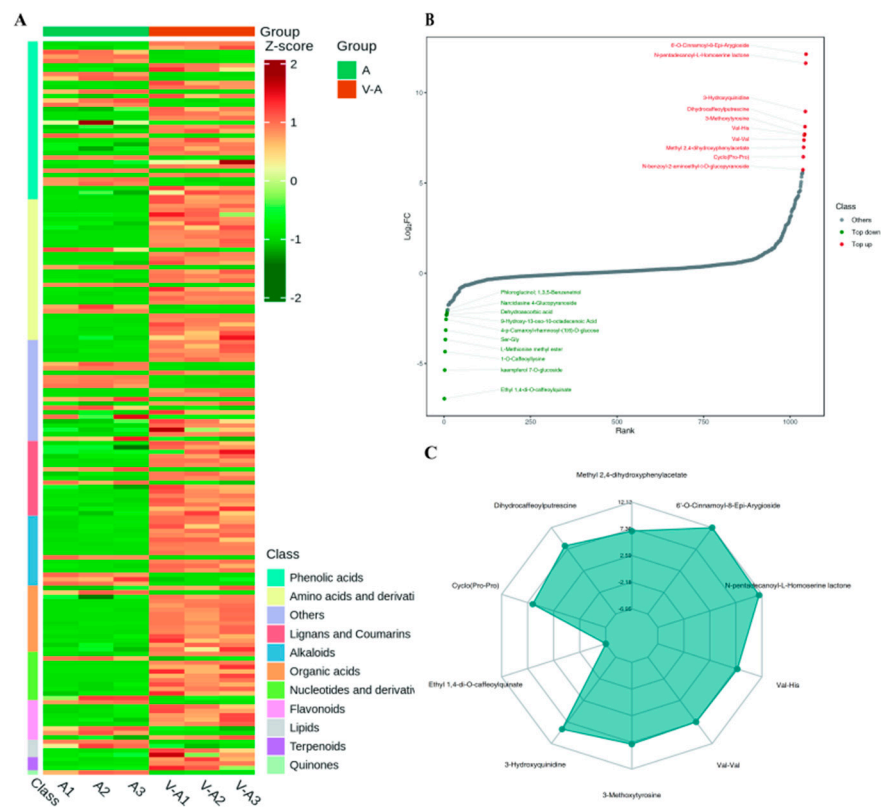

Figure S7. Cluster heat map analysis of various differential compounds.

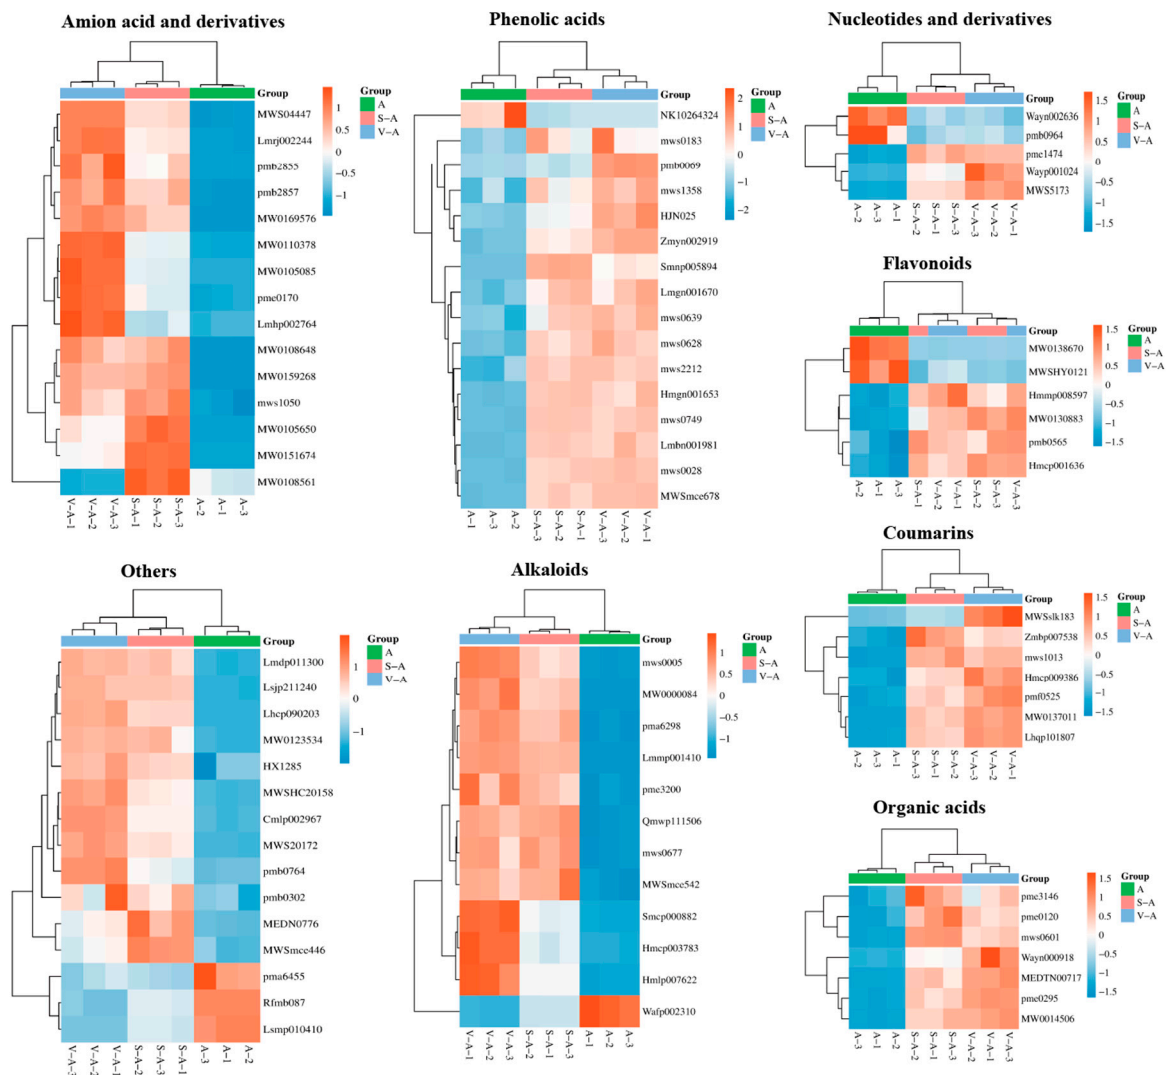



**Table S1 Sample information collection sheet. *A. Sinensis* sample number, plant origin, site of tissue, processed sample and group.**

| Number | Plant Origin       | Site of Tissue | Processed sample            | Group |
|--------|--------------------|----------------|-----------------------------|-------|
| A1     | <i>A. Sinensis</i> | Dried Root     | <i>A. Sinensis</i>          | A     |
| A2     | <i>A. Sinensis</i> | Dried Root     | <i>A. Sinensis</i>          | A     |
| A3     | <i>A. Sinensis</i> | Dried Root     | <i>A. Sinensis</i>          | A     |
| S-A1   | <i>A. Sinensis</i> | Dried Root     | Stir-fry <i>A. Sinensis</i> | S-A   |
| S-A2   | <i>A. Sinensis</i> | Dried Root     | Stir-fry <i>A. Sinensis</i> | S-A   |
| S-A3   | <i>A. Sinensis</i> | Dried Root     | Stir-fry <i>A. Sinensis</i> | S-A   |
| V-A1   | <i>A. Sinensis</i> | Dried Root     | Vinegar <i>A. Sinensis</i>  | V-A   |
| V-A2   | <i>A. Sinensis</i> | Dried Root     | Vinegar <i>A. Sinensis</i>  | V-A   |
| V-A3   | <i>A. Sinensis</i> | Dried Root     | Vinegar <i>A. Sinensis</i>  | V-A   |

**Table S2. 83 differential compounds of *A. sinensis* during processing.**

| Num. | Index      | Formula                                                       | Compounds                                    | Class I                     | A                  | S-A                | V-A                | VIP  | P-value                |
|------|------------|---------------------------------------------------------------|----------------------------------------------|-----------------------------|--------------------|--------------------|--------------------|------|------------------------|
| 1    | Lmhp002764 | C <sub>11</sub> H <sub>18</sub> N <sub>2</sub> O <sub>2</sub> | Cyclo(Proline-Leucine)                       | Amino acids and derivatives | $1.80 \times 10^4$ | $5.55 \times 10^4$ | $1.56 \times 10^5$ | 1.62 | $1.68 \times 10^{-6}$  |
| 2    | Lmrj002244 | C <sub>10</sub> H <sub>14</sub> N <sub>2</sub> O <sub>2</sub> | Cyclo(Proline-Proline)                       | Amino acids and derivatives | $1.32 \times 10^4$ | $6.95 \times 10^5$ | $1.15 \times 10^6$ | 1.49 | $3.66 \times 10^{-8}$  |
| 3    | MW0105085  | C <sub>10</sub> H <sub>13</sub> NO <sub>4</sub>               | 3-Methoxytyrosine                            | Amino acids and derivatives | $5.77 \times 10^3$ | $4.51 \times 10^5$ | $1.20 \times 10^6$ | 1.51 | $4.33 \times 10^{-8}$  |
| 4    | MW0105650  | C <sub>10</sub> H <sub>20</sub> N <sub>6</sub> O <sub>4</sub> | Arginine-Asparagine                          | Amino acids and derivatives | $2.13 \times 10^4$ | $1.75 \times 10^6$ | $9.71 \times 10^5$ | 1.30 | $1.07 \times 10^{-6}$  |
| 5    | MW0108561  | C <sub>9</sub> H <sub>18</sub> N <sub>4</sub> O <sub>4</sub>  | <i>N</i> 2-(1-Carboxyethyl)-L-arginine       | Amino acids and derivatives | $3.26 \times 10^5$ | $7.54 \times 10^5$ | $8.01 \times 10^4$ | 1.01 | $5.02 \times 10^{-7}$  |
| 6    | MW0108648  | C <sub>13</sub> H <sub>17</sub> NO <sub>4</sub>               | Ethyl <i>N</i> -acetyl-L-tyrosinate          | Amino acids and derivatives | $2.02 \times 10^4$ | $6.20 \times 10^5$ | $6.14 \times 10^5$ | 1.41 | $5.77 \times 10^{-5}$  |
| 7    | MW0110378  | C <sub>10</sub> H <sub>20</sub> N <sub>2</sub> O <sub>3</sub> | Valine-Valine                                | Amino acids and derivatives | $1.78 \times 10^3$ | $1.24 \times 10^5$ | $2.95 \times 10^5$ | 1.51 | $8.32 \times 10^{-11}$ |
| 8    | MW0151674  | C <sub>12</sub> H <sub>24</sub> N <sub>2</sub> O <sub>3</sub> | Isoleucine-Leucine                           | Amino acids and derivatives | $4.03 \times 10^3$ | $3.58 \times 10^5$ | $1.84 \times 10^5$ | 1.29 | $4.79 \times 10^{-9}$  |
| 9    | MW0159268  | C <sub>11</sub> H <sub>18</sub> N <sub>4</sub> O <sub>3</sub> | Valine-Histidine                             | Amino acids and derivatives | $3.26 \times 10^4$ | $7.07 \times 10^6$ | $6.54 \times 10^6$ | 1.41 | $8.25 \times 10^{-7}$  |
| 10   | MW0169576  | C <sub>19</sub> H <sub>35</sub> NO <sub>3</sub>               | <i>N</i> -pentadecanoyl-L-Homoserine lactone | Amino acids and derivatives | 9.00               | $2.26 \times 10^4$ | $2.86 \times 10^4$ | 1.44 | $5.04 \times 10^{-8}$  |
| 11   | MWS04447   | C <sub>6</sub> H <sub>11</sub> NO <sub>2</sub>                | Homoproline                                  | Amino acids and derivatives | $5.71 \times 10^5$ | $1.66 \times 10^6$ | $2.17 \times 10^6$ | 1.55 | $4.95 \times 10^{-10}$ |
| 12   | mws1050    | C <sub>5</sub> H <sub>9</sub> NO <sub>4</sub>                 | <i>O</i> -Acetylserine                       | Amino acids and derivatives | $1.77 \times 10^5$ | $6.40 \times 10^5$ | $5.47 \times 10^5$ | 1.29 | $2.24 \times 10^{-5}$  |
| 13   | pmb2855    | C <sub>11</sub> H <sub>20</sub> N <sub>2</sub> O <sub>8</sub> | L-Glutamine- <i>O</i> -glycoside             | Amino acids and derivatives | $5.47 \times 10^4$ | $8.20 \times 10^5$ | $1.31 \times 10^6$ | 1.51 | $1.13 \times 10^{-4}$  |

|    |            |                                                                 |                                                  |                             |                        |                        |                        |      |                         |
|----|------------|-----------------------------------------------------------------|--------------------------------------------------|-----------------------------|------------------------|------------------------|------------------------|------|-------------------------|
| 14 | pmb2857    | C <sub>11</sub> H <sub>19</sub> NO <sub>9</sub>                 | L-Glutamic acid- <i>O</i> -glycoside             | Amino acids and derivatives | 1.35 × 10 <sup>4</sup> | 2.00 × 10 <sup>5</sup> | 2.46 × 10 <sup>5</sup> | 1.46 | 1.19 × 10 <sup>-5</sup> |
| 15 | pme0170    | C <sub>8</sub> H <sub>16</sub> N <sub>4</sub> O <sub>3</sub>    | <i>N</i> -Acetyl-L-Arginine                      | Amino acids and derivatives | 1.01 × 10 <sup>5</sup> | 2.67 × 10 <sup>5</sup> | 4.99 × 10 <sup>5</sup> | 1.62 | 7.48 × 10 <sup>-7</sup> |
| 16 | HJN025     | C <sub>7</sub> H <sub>8</sub> O <sub>2</sub>                    | 4-Hydroxybenzyl Alcohol                          | Phenolic acids              | 2.32 × 10 <sup>3</sup> | 2.55 × 10 <sup>4</sup> | 5.34 × 10 <sup>4</sup> | 1.49 | 1.65 × 10 <sup>-5</sup> |
| 17 | Hmgn001653 | C <sub>7</sub> H <sub>6</sub> O <sub>3</sub>                    | Protocatechualdehyde                             | Phenolic acids              | 1.78 × 10 <sup>5</sup> | 1.71 × 10 <sup>6</sup> | 1.63 × 10 <sup>6</sup> | 1.40 | 1.12 × 10 <sup>-5</sup> |
| 18 | Lmbn001981 | C <sub>7</sub> H <sub>6</sub> O <sub>3</sub>                    | 2,5-Dihydroxybenzaldehyde                        | Phenolic acids              | 2.49 × 10 <sup>5</sup> | 2.18 × 10 <sup>6</sup> | 2.20 × 10 <sup>6</sup> | 1.41 | 8.16 × 10 <sup>-6</sup> |
| 19 | Lmgn001670 | C <sub>7</sub> H <sub>6</sub> O <sub>3</sub>                    | Salicylic acid                                   | Phenolic acids              | 1.01 × 10 <sup>5</sup> | 2.20 × 10 <sup>5</sup> | 2.23 × 10 <sup>5</sup> | 1.36 | 2.36 × 10 <sup>-3</sup> |
| 20 | mws0028    | C <sub>8</sub> H <sub>8</sub> O <sub>4</sub>                    | Vanillic acid                                    | Phenolic acids              | 2.92 × 10 <sup>5</sup> | 1.78 × 10 <sup>6</sup> | 1.92 × 10 <sup>6</sup> | 1.45 | 1.34 × 10 <sup>-7</sup> |
| 21 | mws0183    | C <sub>7</sub> H <sub>6</sub> O <sub>4</sub>                    | 3,4-Dihydroxybenzoic acid (Protocatechuic acid)* | Phenolic acids              | 2.13 × 10 <sup>5</sup> | 8.96 × 10 <sup>5</sup> | 9.81 × 10 <sup>5</sup> | 1.31 | 6.56 × 10 <sup>-2</sup> |
| 22 | mws0628    | C <sub>7</sub> H <sub>6</sub> O <sub>2</sub>                    | 4-Hydroxybenzaldehyde                            | Phenolic acids              | 4.09 × 10 <sup>5</sup> | 8.60 × 10 <sup>5</sup> | 9.27 × 10 <sup>5</sup> | 1.46 | 2.93 × 10 <sup>-5</sup> |
| 23 | mws0639    | C <sub>7</sub> H <sub>6</sub> O <sub>4</sub>                    | 2,3-Dihydroxybenzoic Acid*                       | Phenolic acids              | 1.89 × 10 <sup>5</sup> | 5.09 × 10 <sup>5</sup> | 5.96 × 10 <sup>5</sup> | 1.40 | 9.82 × 10 <sup>-4</sup> |
| 24 | mws0749    | C <sub>7</sub> H <sub>6</sub> O <sub>3</sub>                    | 4-Hydroxybenzoic acid                            | Phenolic acids              | 4.48 × 10 <sup>5</sup> | 2.44 × 10 <sup>6</sup> | 2.35 × 10 <sup>6</sup> | 1.40 | 3.26 × 10 <sup>-7</sup> |
| 25 | mws1358    | C <sub>6</sub> H <sub>6</sub> O <sub>2</sub>                    | Pyrocatechol                                     | Phenolic acids              | 2.09 × 10 <sup>4</sup> | 4.38 × 10 <sup>4</sup> | 5.42 × 10 <sup>4</sup> | 1.41 | 3.10 × 10 <sup>-3</sup> |
| 26 | mws2212    | C <sub>9</sub> H <sub>8</sub> O <sub>4</sub>                    | Caffeic acid                                     | Phenolic acids              | 2.73 × 10 <sup>6</sup> | 1.06 × 10 <sup>7</sup> | 1.06 × 10 <sup>7</sup> | 1.32 | 1.46 × 10 <sup>-4</sup> |
| 27 | MWSmce678  | C <sub>11</sub> H <sub>14</sub> O <sub>3</sub>                  | Deoxyarbutin                                     | Phenolic acids              | 6.37 × 10 <sup>4</sup> | 2.36 × 10 <sup>5</sup> | 2.63 × 10 <sup>5</sup> | 1.47 | 2.22 × 10 <sup>-7</sup> |
| 28 | NK10264324 | C <sub>6</sub> H <sub>6</sub> O <sub>3</sub>                    | Phloroglucinol; 1,3,5-Benzenetriol               | Phenolic acids              | 1.32 × 10 <sup>6</sup> | 2.37 × 10 <sup>5</sup> | 3.21 × 10 <sup>5</sup> | 1.18 | 2.44 × 10 <sup>-2</sup> |
| 29 | pmb0069    | C <sub>7</sub> H <sub>7</sub> NO                                | Benzamide                                        | Phenolic acids              | 2.54 × 10 <sup>4</sup> | 5.16 × 10 <sup>4</sup> | 1.97 × 10 <sup>5</sup> | 1.60 | 9.83 × 10 <sup>-8</sup> |
| 30 | Smnp005894 | C <sub>25</sub> H <sub>28</sub> O <sub>12</sub>                 | 6'- <i>O</i> -Cinnamoyl-8-Epi-Arygioside         | Phenolic acids              | 9.00                   | 6.49 × 10 <sup>4</sup> | 4.04 × 10 <sup>4</sup> | 1.38 | 5.08 × 10 <sup>-7</sup> |
| 31 | Zmyn002919 | C <sub>8</sub> H <sub>8</sub> O <sub>2</sub>                    | 2-Methylbenzoic acid                             | Phenolic acids              | 2.07 × 10 <sup>3</sup> | 2.35 × 10 <sup>4</sup> | 3.46 × 10 <sup>4</sup> | 1.48 | 5.30 × 10 <sup>-7</sup> |
| 32 | MWS5173    | C <sub>4</sub> H <sub>5</sub> N <sub>3</sub> O                  | Isocytosine                                      | Nucleotides and derivatives | 1.02 × 10 <sup>6</sup> | 2.80 × 10 <sup>6</sup> | 3.50 × 10 <sup>6</sup> | 1.53 | 7.62 × 10 <sup>-8</sup> |
| 33 | pmb0964    | C <sub>16</sub> H <sub>23</sub> N <sub>5</sub> O <sub>5</sub>   | Isopentenyladenine-7-N-glucoside                 | Nucleotides and derivatives | 7.06 × 10 <sup>5</sup> | 2.17 × 10 <sup>5</sup> | 2.54 × 10 <sup>5</sup> | 1.14 | 1.21 × 10 <sup>-2</sup> |
| 34 | pme1474    | C <sub>11</sub> H <sub>15</sub> N <sub>5</sub> O <sub>3</sub> S | 5'-Deoxy-5'-(methylthio)adenosine                | Nucleotides and derivatives | 1.19 × 10 <sup>7</sup> | 4.08 × 10 <sup>7</sup> | 3.97 × 10 <sup>7</sup> | 1.40 | 1.82 × 10 <sup>-6</sup> |
| 35 | Wayn002636 | C <sub>17</sub> H <sub>22</sub> N <sub>2</sub> O <sub>7</sub>   | <i>N</i> -(1-Deoxy-1-fructosyl)Tryptophan        | Nucleotides and derivatives | 2.57 × 10 <sup>6</sup> | 1.21 × 10 <sup>6</sup> | 1.13 × 10 <sup>6</sup> | 1.44 | 2.62 × 10 <sup>-5</sup> |

|    |            |                                                               |                                       |                 |                    |                    |                    |      |                        |
|----|------------|---------------------------------------------------------------|---------------------------------------|-----------------|--------------------|--------------------|--------------------|------|------------------------|
|    |            |                                                               |                                       | Nucleotides and |                    |                    |                    |      |                        |
| 36 | Wayp001024 | C <sub>11</sub> H <sub>21</sub> NO <sub>7</sub>               | <i>N</i> -(1-Deoxy-1-fructosyl)Valine | derivatives     | $1.03 \times 10^4$ | $2.47 \times 10^5$ | $4.89 \times 10^5$ | 1.53 | $4.60 \times 10^{-5}$  |
| 37 | Hmcp001636 | C <sub>23</sub> H <sub>24</sub> O <sub>13</sub>               | Limocitrin-7- <i>O</i> -glucoside     | Flavonoids      | $7.72 \times 10^4$ | $1.82 \times 10^5$ | $1.67 \times 10^5$ | 1.31 | $3.76 \times 10^{-5}$  |
|    |            |                                                               | 4,4'-Dihydroxy-2'-methoxychalcone     |                 |                    |                    |                    |      |                        |
| 38 | Hmmp008597 | C <sub>16</sub> H <sub>14</sub> O <sub>4</sub>                | (3-Deoxysappanchalcone)               | Flavonoids      | $1.04 \times 10^4$ | $4.99 \times 10^4$ | $6.57 \times 10^4$ | 1.48 | $5.58 \times 10^{-5}$  |
| 39 | MW0130883  | C <sub>19</sub> H <sub>18</sub> O <sub>5</sub>                | 2-Methyl-5,7,8-trimethoxyisoflavone   | Flavonoids      | $4.46 \times 10^4$ | $1.16 \times 10^5$ | $1.23 \times 10^5$ | 1.43 | $9.92 \times 10^{-4}$  |
| 40 | MW0138670  | C <sub>21</sub> H <sub>20</sub> O <sub>11</sub>               | kaempferol 7- <i>O</i> -glucoside     | Flavonoids      | $1.08 \times 10^6$ | $3.60 \times 10^4$ | $2.62 \times 10^4$ | 1.47 | $3.80 \times 10^{-6}$  |
| 41 | MWSHY0121  | C <sub>21</sub> H <sub>18</sub> O <sub>12</sub>               | Luteolin-7- <i>O</i> -glucuronide     | Flavonoids      | $7.43 \times 10^4$ | $2.67 \times 10^4$ | $3.33 \times 10^4$ | 1.18 | $1.75 \times 10^{-4}$  |
| 42 | pmb0565    | C <sub>23</sub> H <sub>24</sub> O <sub>13</sub>               | Syringetin-3- <i>O</i> -glucoside     | Flavonoids      | $7.08 \times 10^4$ | $1.59 \times 10^5$ | $1.58 \times 10^5$ | 1.35 | $5.52 \times 10^{-4}$  |
|    |            |                                                               |                                       | Lignans and     |                    |                    |                    |      |                        |
| 43 | Hmcp009386 | C <sub>16</sub> H <sub>14</sub> O <sub>4</sub>                | Alloimperatorin                       | Coumarins       | $1.04 \times 10^4$ | $4.89 \times 10^4$ | $6.52 \times 10^4$ | 1.48 | $7.28 \times 10^{-6}$  |
|    |            |                                                               | 4-(3-Methoxy-4-hydroxy)phenyl-3-met   | Lignans and     |                    |                    |                    |      |                        |
| 44 | HX1285     | C <sub>12</sub> H <sub>14</sub> O <sub>3</sub>                | hyl-3-buten-2-one                     | Coumarins       | $1.63 \times 10^5$ | $4.50 \times 10^5$ | $5.09 \times 10^5$ | 1.18 | $1.29 \times 10^{-3}$  |
|    |            |                                                               |                                       | Lignans and     |                    |                    |                    |      |                        |
| 45 | Lhqp101807 | C <sub>15</sub> H <sub>16</sub> O <sub>3</sub>                | Osthole                               | Coumarins       | $8.76 \times 10^5$ | $9.72 \times 10^6$ | $1.21 \times 10^7$ | 1.47 | $1.08 \times 10^{-8}$  |
|    |            |                                                               | 7-Hydroxy-3-(4-methoxyphenyl)-4-me    | Lignans and     |                    |                    |                    |      |                        |
| 46 | MW0137011  | C <sub>17</sub> H <sub>14</sub> O <sub>4</sub>                | thylcoumarin                          | Coumarins       | $9.00 \times 10^5$ | $7.97 \times 10^6$ | $9.47 \times 10^6$ | 1.47 | $5.57 \times 10^{-8}$  |
|    |            |                                                               |                                       | Lignans and     |                    |                    |                    |      |                        |
| 47 | mws1013    | C <sub>9</sub> H <sub>6</sub> O <sub>4</sub>                  | Esculetin (6,7-Dihydroxycoumarin)     | Coumarins       | $2.55 \times 10^5$ | $8.01 \times 10^5$ | $7.49 \times 10^5$ | 1.37 | $1.45 \times 10^{-6}$  |
|    |            |                                                               |                                       | Lignans and     |                    |                    |                    |      |                        |
| 48 | MWSslk183  | C <sub>15</sub> H <sub>10</sub> O <sub>4</sub>                | 7,8-Dihydroxy-4-phenylcoumarin        | Coumarins       | $1.16 \times 10^4$ | $3.19 \times 10^4$ | $1.27 \times 10^5$ | 1.62 | $9.30 \times 10^{-6}$  |
|    |            |                                                               |                                       | Lignans and     |                    |                    |                    |      |                        |
| 49 | pmf0525    | C <sub>16</sub> H <sub>14</sub> O <sub>4</sub>                | Imperatorin                           | Coumarins       | $6.90 \times 10^3$ | $5.90 \times 10^4$ | $7.79 \times 10^4$ | 1.46 | $4.76 \times 10^{-6}$  |
|    |            |                                                               |                                       | Lignans and     |                    |                    |                    |      |                        |
| 50 | Zmbp007538 | C <sub>14</sub> H <sub>14</sub> O <sub>3</sub>                | Osthenol                              | Coumarins       | $8.33 \times 10^4$ | $2.13 \times 10^5$ | $1.75 \times 10^5$ | 1.21 | $2.82 \times 10^{-5}$  |
| 51 | Hmcp003783 | C <sub>13</sub> H <sub>10</sub> N <sub>2</sub> O              | 1-Acetyl-β-carboline                  | Alkaloids       | $1.35 \times 10^4$ | $1.19 \times 10^5$ | $3.03 \times 10^5$ | 1.59 | $5.84 \times 10^{-8}$  |
| 52 | Hmlp007622 | C <sub>18</sub> H <sub>29</sub> NO <sub>3</sub>               | Decanoyl vanillylamide                | Alkaloids       | $6.70 \times 10^6$ | $1.35 \times 10^7$ | $2.13 \times 10^7$ | 1.62 | $2.31 \times 10^{-6}$  |
| 53 | Lmmp001410 | C <sub>13</sub> H <sub>20</sub> N <sub>2</sub> O <sub>3</sub> | Dihydrocaffeoylputrescine             | Alkaloids       | $7.41 \times 10^3$ | $1.84 \times 10^6$ | $2.06 \times 10^6$ | 1.43 | $2.84 \times 10^{-12}$ |
| 54 | MW0000084  | C <sub>20</sub> H <sub>24</sub> N <sub>2</sub> O <sub>3</sub> | 3-Hydroxyquinidine                    | Alkaloids       | $4.58 \times 10^3$ | $1.74 \times 10^6$ | $2.28 \times 10^6$ | 1.44 | $4.54 \times 10^{-7}$  |

|    |            |                                                               |                                                                                          |               |                    |                    |                    |      |                       |
|----|------------|---------------------------------------------------------------|------------------------------------------------------------------------------------------|---------------|--------------------|--------------------|--------------------|------|-----------------------|
| 55 | mws0005    | C <sub>10</sub> H <sub>12</sub> N <sub>2</sub>                | Tryptamine                                                                               | Alkaloids     | $8.49 \times 10^4$ | $7.27 \times 10^5$ | $9.96 \times 10^5$ | 1.50 | $2.54 \times 10^{-8}$ |
| 56 | mws0677    | C <sub>12</sub> H <sub>14</sub> N <sub>2</sub> O <sub>2</sub> | N-Acetyl-5-hydroxytryptamine                                                             | Alkaloids     | $4.21 \times 10^5$ | $1.28 \times 10^6$ | $1.21 \times 10^6$ | 1.36 | $2.89 \times 10^{-5}$ |
| 57 | MWSmce542  | C <sub>12</sub> H <sub>14</sub> N <sub>2</sub> O <sub>2</sub> | (S)-Indoximod                                                                            | Alkaloids     | $1.07 \times 10^5$ | $3.04 \times 10^5$ | $2.79 \times 10^5$ | 1.34 | $3.34 \times 10^{-5}$ |
| 58 | pma6298    | C <sub>5</sub> H <sub>5</sub> NO                              | 3-Hydroxypyridine                                                                        | Alkaloids     | $1.94 \times 10^4$ | $2.97 \times 10^5$ | $3.40 \times 10^5$ | 1.44 | $5.49 \times 10^{-7}$ |
| 59 | pme3200    | C <sub>2</sub> H <sub>7</sub> N <sub>3</sub>                  | 1-Methylguanidine                                                                        | Alkaloids     | $1.31 \times 10^4$ | $1.30 \times 10^5$ | $1.57 \times 10^5$ | 1.42 | $1.11 \times 10^{-4}$ |
| 60 | Qmwp111506 | C <sub>21</sub> H <sub>29</sub> NO                            | 1-Methyl-2-[(Z)-6-undecyl]-4(1H)-quinolone<br>N-benzoyl-2-aminoethyl-β-D-glucopyranoside | Alkaloids     | $2.25 \times 10^4$ | $8.10 \times 10^4$ | $7.74 \times 10^4$ | 1.39 | $8.37 \times 10^{-7}$ |
| 61 | Smcp000882 | C <sub>15</sub> H <sub>21</sub> NO <sub>7</sub>               | anose                                                                                    | Alkaloids     | $1.08 \times 10^4$ | $2.41 \times 10^5$ | $5.70 \times 10^5$ | 1.55 | $1.99 \times 10^{-8}$ |
| 62 | Wafp002310 | C <sub>15</sub> H <sub>20</sub> N <sub>2</sub> O <sub>5</sub> | 1-O-Caffeoyllysine                                                                       | Alkaloids     | $1.83 \times 10^6$ | $5.97 \times 10^5$ | $9.05 \times 10^4$ | 1.61 | $3.30 \times 10^{-7}$ |
| 63 | MEDTN00717 | C <sub>20</sub> H <sub>26</sub> O <sub>3</sub>                | 4-Oxoretinoic acid                                                                       | Organic acids | $7.48 \times 10^3$ | $7.72 \times 10^4$ | $9.76 \times 10^4$ | 1.47 | $4.63 \times 10^{-6}$ |
| 64 | MW0014506  | C <sub>20</sub> H <sub>28</sub> O <sub>3</sub>                | 4-Hydroxyretinoic acid                                                                   | Organic acids | $3.92 \times 10^5$ | $3.91 \times 10^6$ | $4.61 \times 10^6$ | 1.46 | $2.79 \times 10^{-6}$ |
| 65 | mws0601    | C <sub>5</sub> H <sub>5</sub> NO <sub>2</sub>                 | Pyrrole-2-carboxylic acid                                                                | Organic acids | $3.08 \times 10^4$ | $1.83 \times 10^5$ | $1.47 \times 10^5$ | 1.31 | $6.80 \times 10^{-8}$ |
| 66 | pme0120    | C <sub>5</sub> H <sub>11</sub> NO <sub>2</sub>                | 5-Aminovaleric acid                                                                      | Organic acids | $8.62 \times 10^4$ | $2.46 \times 10^5$ | $2.07 \times 10^5$ | 1.26 | $1.42 \times 10^{-4}$ |
| 67 | pme0295    | C <sub>6</sub> H <sub>11</sub> NO <sub>3</sub>                | 4-Acetamidobutyric acid                                                                  | Organic acids | $2.89 \times 10^5$ | $6.13 \times 10^5$ | $7.12 \times 10^5$ | 1.52 | $1.96 \times 10^{-7}$ |
| 68 | pme3146    | C <sub>5</sub> H <sub>10</sub> N <sub>2</sub> O <sub>3</sub>  | β-Ureidoisobutyric acid                                                                  | Organic acids | $3.46 \times 10^3$ | $1.64 \times 10^4$ | $1.18 \times 10^4$ | 1.16 | $1.14 \times 10^{-3}$ |
| 69 | Wayn000918 | C <sub>18</sub> H <sub>28</sub> O <sub>17</sub>               | Isocitric acid-1-O-diglucoside                                                           | Organic acids | $8.48 \times 10^4$ | $3.23 \times 10^5$ | $5.61 \times 10^5$ | 1.58 | $2.08 \times 10^{-4}$ |
| 70 | Lmdp011300 | C <sub>17</sub> H <sub>20</sub> O <sub>4</sub>                | Angeloyl Senkyunolide F                                                                  | Others        | $1.82 \times 10^6$ | $4.37 \times 10^6$ | $4.72 \times 10^6$ | 1.47 | $7.76 \times 10^{-7}$ |
| 71 | Lsjp211240 | C <sub>6</sub> H <sub>6</sub> N <sub>2</sub> O                | Nicotinamide                                                                             | Others        | $1.59 \times 10^6$ | $2.48 \times 10^7$ | $2.71 \times 10^7$ | 1.44 | $1.02 \times 10^{-7}$ |
| 72 | Lsmp010410 | C <sub>27</sub> H <sub>28</sub> O <sub>12</sub>               | Ethyl 1,4-di-O-caffeoylquininate                                                         | Others        | $3.27 \times 10^6$ | $9.43 \times 10^5$ | $2.65 \times 10^4$ | 1.57 | $3.08 \times 10^{-7}$ |
| 73 | pmb0302    | C <sub>2</sub> H <sub>8</sub> NO <sub>3</sub> P               | 2-Aminoethylphosphonate                                                                  | Others        | $1.82 \times 10^4$ | $4.25 \times 10^4$ | $4.46 \times 10^4$ | 1.20 | $5.08 \times 10^{-2}$ |
| 74 | pmb0764    | C <sub>6</sub> H <sub>9</sub> NOS                             | 4-Methyl-5-thiazoleethanol                                                               | Others        | $3.42 \times 10^4$ | $1.90 \times 10^5$ | $4.22 \times 10^5$ | 1.59 | $1.06 \times 10^{-6}$ |
| 75 | MWS20172   | C <sub>6</sub> H <sub>6</sub> O <sub>3</sub>                  | 5-Hydroxymethylfurfural                                                                  | Others        | $2.54 \times 10^5$ | $4.02 \times 10^6$ | $5.93 \times 10^6$ | 1.50 | $1.32 \times 10^{-7}$ |
| 76 | MWSHC20158 | C <sub>6</sub> H <sub>6</sub> O <sub>3</sub>                  | 5-Methoxyfurfural                                                                        | Others        | $3.03 \times 10^5$ | $3.66 \times 10^6$ | $5.84 \times 10^6$ | 1.51 | $4.84 \times 10^{-7}$ |
| 77 | Lhcp090203 | C <sub>13</sub> H <sub>20</sub> O                             | α-Ionone                                                                                 | Others        | $4.41 \times 10^5$ | $2.57 \times 10^6$ | $3.20 \times 10^6$ | 1.49 | $3.19 \times 10^{-9}$ |
| 78 | MW0123534  | C <sub>10</sub> H <sub>18</sub> O <sub>2</sub>                | delta-Decalactone                                                                        | Others        | $6.04 \times 10^5$ | $3.72 \times 10^6$ | $4.22 \times 10^6$ | 1.46 | $1.24 \times 10^{-4}$ |
| 79 | MWSmce446  | C <sub>22</sub> H <sub>28</sub> O <sub>11</sub>               | Cimifugin-7-O-glucoside                                                                  | Others        | $2.02 \times 10^4$ | $1.35 \times 10^5$ | $6.95 \times 10^4$ | 1.02 | $3.73 \times 10^{-5}$ |
| 80 | MEDN0776   | C <sub>20</sub> H <sub>32</sub> O <sub>4</sub>                | 5,15-DiHETE                                                                              | Lipids        | $1.85 \times 10^5$ | $2.96 \times 10^6$ | $1.63 \times 10^6$ | 1.21 | $3.44 \times 10^{-4}$ |
| 81 | Rfmb087    | C <sub>18</sub> H <sub>32</sub> O <sub>4</sub>                | 9-Hydroxy-13-oxo-10-octadecenoic                                                         | Lipids        | $4.94 \times 10^5$ | $2.23 \times 10^5$ | $9.95 \times 10^4$ | 1.62 | $3.72 \times 10^{-8}$ |

|    |            |                                                 |                      |            |                    |                    |                    |      |                       |
|----|------------|-------------------------------------------------|----------------------|------------|--------------------|--------------------|--------------------|------|-----------------------|
|    |            |                                                 | Acid                 |            |                    |                    |                    |      |                       |
| 82 | pma6455    | C <sub>5</sub> H <sub>11</sub> O <sub>8</sub> P | Ribulose-5-phosphate | Others     | $2.53 \times 10^5$ | $1.24 \times 10^5$ | $1.25 \times 10^5$ | 1.34 | $1.12 \times 10^{-3}$ |
| 83 | Cmlp002967 | C <sub>10</sub> H <sub>12</sub> O <sub>5</sub>  | Gentiolactone        | Terpenoids | $8.90 \times 10^3$ | $7.69 \times 10^4$ | $1.29 \times 10^5$ | 1.53 | $2.69 \times 10^{-9}$ |

**Table S3. Grey correlation degree analysis. Grey correlation degree analysis between differential components and antioxidant activity of *A. sinensis* and its processed products.**

| Numbe<br>r | DPPH free radical<br>scavenging |                        | Hydroxyl free radical<br>scavenging |                        | T-AOC                   |                        |
|------------|---------------------------------|------------------------|-------------------------------------|------------------------|-------------------------|------------------------|
|            | Chemical<br>composition         | Correlatio<br>n degree | Chemical<br>composition             | Correlatio<br>n degree | Chemical<br>composition | Correlatio<br>n degree |
| 1          | mws0628                         | 0.857                  | mws0628                             | 0.814                  | mws0628                 | 0.851                  |
| 2          | pmb0565                         | 0.856                  | pme0295                             | 0.81                   | pme0295                 | 0.844                  |
| 3          | Hmcp001636                      | 0.849                  | pmb0565                             | 0.809                  | Hmcp001636              | 0.843                  |
| 4          | pme0295                         | 0.847                  | Hmcp001636                          | 0.805                  | pmb0565                 | 0.84                   |
| 5          | mws1358                         | 0.847                  | Lmgn001670                          | 0.805                  | Zmbp007538              | 0.838                  |
| 6          | Lmgn001670                      | 0.84                   | Zmbp007538                          | 0.801                  | Lmgn001670              | 0.835                  |
| 7          | Hmlp007622                      | 0.836                  | pmb0302                             | 0.793                  | Lmdp011300              | 0.829                  |
| 8          | Zmbp007538                      | 0.835                  | Lmdp011300                          | 0.793                  | pme0120                 | 0.821                  |
| 9          | Lmdp011300                      | 0.834                  | mws1358                             | 0.792                  | mws1358                 | 0.819                  |
| 10         | pme0120                         | 0.827                  | pma6455                             | 0.786                  | pmb0302                 | 0.815                  |
| 11         | MW0130883                       | 0.825                  | pme0120                             | 0.785                  | MWSmce542               | 0.815                  |
| 12         | MWSmce542                       | 0.821                  | MWSmce542                           | 0.779                  | HX1285                  | 0.813                  |
| 13         | HX1285                          | 0.816                  | HX1285                              | 0.779                  | MWS5173                 | 0.808                  |
| 14         | pmb0302                         | 0.813                  | MWS5173                             | 0.774                  | mws0677                 | 0.804                  |
| 15         | mws1013                         | 0.812                  | mws0677                             | 0.769                  | MWS04447                | 0.802                  |
| 16         | mws0639                         | 0.811                  | MWS04447                            | 0.769                  | mws1013                 | 0.8                    |
| 17         | MWS5173                         | 0.805                  | MW0130883                           | 0.768                  | MW0130883               | 0.799                  |
| 18         | mws0677                         | 0.802                  | mws1013                             | 0.765                  | mws1050                 | 0.79                   |
| 19         | pme1474                         | 0.798                  | Wayn002636                          | 0.763                  | pme1474                 | 0.788                  |
| 20         | MWS04447                        | 0.797                  | Hmlp007622                          | 0.761                  | Qmwp111506              | 0.783                  |
| 21         | mws1050                         | 0.796                  | mws1050                             | 0.755                  | mws0639                 | 0.783                  |
| 22         | Qmwp111506                      | 0.794                  | mws0639                             | 0.754                  | Hmlp007622              | 0.779                  |
| 23         | mws2212                         | 0.784                  | pme1474                             | 0.754                  | mws2212                 | 0.777                  |
| 24         | MWSmce678                       | 0.779                  | Qmwp111506                          | 0.75                   | MWSmce678               | 0.777                  |
| 25         | Wayn000918                      | 0.776                  | MWSmce678                           | 0.744                  | mws0183                 | 0.765                  |
| 26         | pme0170                         | 0.773                  | MWSHY0121                           | 0.743                  | pme3146                 | 0.764                  |

|    |                |       |                |       |                |       |
|----|----------------|-------|----------------|-------|----------------|-------|
| 27 | mws0601        | 0.767 | mws2212        | 0.743 | pma6455        | 0.76  |
| 28 | pme3146        | 0.76  | pme3146        | 0.738 | Hmcp009386     | 0.757 |
| 29 | mws0749        | 0.757 | mws0183        | 0.736 | mws0601        | 0.749 |
| 30 | Hmmp008597     | 0.757 | Hmcp009386     | 0.732 | Hmmp008597     | 0.748 |
| 31 | Hmcp009386     | 0.756 | Hmmp008597     | 0.724 | mws0749        | 0.748 |
| 32 | pma6455        | 0.754 | Wayn000918     | 0.721 | Lhcp090203     | 0.745 |
| 33 | mws0183        | 0.749 | MWSmce446      | 0.72  | MWSmce446      | 0.744 |
| 34 | MW0123534      | 0.747 | pmb0964        | 0.72  | mws0028        | 0.74  |
| 35 | mws0028        | 0.744 | mws0601        | 0.716 | Wayn002636     | 0.739 |
| 36 | Lhcp090203     | 0.742 | mws0749        | 0.716 | Wayn000918     | 0.734 |
| 37 | Wayn002636     | 0.736 | Lhcp090203     | 0.714 | mws0005        | 0.733 |
| 38 | Cmlp002967     | 0.732 | Cmlp002967     | 0.714 | pmf0525        | 0.732 |
| 39 | Lmbn001981     | 0.731 | pme0170        | 0.712 | Zmyn002919     | 0.728 |
| 40 | Hmgcn001653    | 0.73  | mws0028        | 0.709 | pme0170        | 0.727 |
| 41 | pmf0525        | 0.726 | mws0005        | 0.703 | MW0123534      | 0.727 |
| 42 | mws0005        | 0.725 | pmf0525        | 0.702 | Cmlp002967     | 0.727 |
| 43 | pme3200        | 0.724 | MWSHC2015<br>8 | 0.701 | pme3200        | 0.725 |
| 44 | MW0137011      | 0.724 | MW0123534      | 0.701 | MW0137011      | 0.724 |
| 45 | pmb2855        | 0.722 | Zmyn002919     | 0.701 | Lmbn001981     | 0.724 |
| 46 | MWSHC2015<br>8 | 0.722 | MW0108561      | 0.698 | MWSHC2015<br>8 | 0.722 |
| 47 | MW0014506      | 0.72  | Rfmb087        | 0.697 | MWS20172       | 0.722 |
| 48 | HJN025         | 0.72  | pme3200        | 0.696 | MW0014506      | 0.721 |
| 49 | MEDTN00717     | 0.72  | MEDTN00717     | 0.695 | MWSHY0121      | 0.72  |
| 50 | Zmyn002919     | 0.719 | MW0137011      | 0.694 | Hmgcn001653    | 0.72  |
| 51 | pmb0764        | 0.717 | MWS20172       | 0.693 | MEDTN00717     | 0.719 |
| 52 | Lhqp101807     | 0.716 | Lmbn001981     | 0.693 | Lhqp101807     | 0.719 |
| 53 | Wayp001024     | 0.713 | MW0014506      | 0.691 | MW0151674      | 0.713 |



|    |            |       |            |       |            |       |
|----|------------|-------|------------|-------|------------|-------|
| 54 | MWS20172   | 0.712 | Hmgn001653 | 0.69  | pmb2857    | 0.713 |
| 55 | MWSHY0121  | 0.711 | Lmrj002244 | 0.689 | Lmrj002244 | 0.712 |
| 56 | pmb2857    | 0.71  | Lhqp101807 | 0.689 | MW0105650  | 0.712 |
| 57 | pma6298    | 0.709 | MEDN0776   | 0.688 | MEDN0776   | 0.712 |
| 58 | Lsjp211240 | 0.708 | MW0151674  | 0.686 | pma6298    | 0.708 |
| 59 | MWSmce446  | 0.708 | pmb2855    | 0.686 | MW0108561  | 0.708 |
| 60 | Lmrj002244 | 0.706 | pmb2857    | 0.684 | Lsjp211240 | 0.705 |
| 61 | MW0108648  | 0.705 | MW0105650  | 0.681 | pmb2855    | 0.703 |
| 62 | MEDN0776   | 0.704 | pma6298    | 0.679 | pmb0964    | 0.698 |
| 63 | Smcp000882 | 0.698 | Lsjp211240 | 0.676 | Smnp005894 | 0.697 |
| 64 | Smnp005894 | 0.697 | Wayp001024 | 0.67  | MW0108648  | 0.697 |
| 65 | MW0110378  | 0.693 | HJN025     | 0.668 | MW0000084  | 0.694 |
| 66 | MW0159268  | 0.692 | MW0108648  | 0.668 | MW0169576  | 0.692 |
| 67 | Lmhp002764 | 0.692 | Smnp005894 | 0.666 | Wayp001024 | 0.687 |
| 68 | Hmcp003783 | 0.69  | MW0000084  | 0.666 | Lmmp001410 | 0.685 |
| 69 | pmb0964    | 0.69  | MW0169576  | 0.664 | MW0159268  | 0.683 |
| 70 | MW0000084  | 0.689 | pmb0764    | 0.662 | Rfmb087    | 0.68  |
| 71 | MW0105650  | 0.689 | Lmmp001410 | 0.657 | HJN025     | 0.68  |
| 72 | Rfmb087    | 0.688 | MW0159268  | 0.654 | pmb0764    | 0.675 |
| 73 | MW0169576  | 0.688 | NK10264324 | 0.651 | Smcp000882 | 0.652 |
| 74 | Lmmp001410 | 0.687 | Smcp000882 | 0.64  | Lmhp002764 | 0.65  |
| 75 | MW0108561  | 0.684 | MW0110378  | 0.635 | MW0110378  | 0.647 |
| 76 | MW0151674  | 0.68  | Lmhp002764 | 0.634 | Hmcp003783 | 0.646 |
| 77 | MW0105085  | 0.673 | Hmcp003783 | 0.633 | NK10264324 | 0.636 |
| 78 | pmb0069    | 0.658 | MW0105085  | 0.619 | MW0105085  | 0.631 |
| 79 | MWSslk183  | 0.643 | Wafp002310 | 0.618 | pmb0069    | 0.622 |
| 80 | NK10264324 | 0.629 | pmb0069    | 0.605 | MWSslk183  | 0.608 |
| 81 | Wafp002310 | 0.616 | Lsmp010410 | 0.594 | Wafp002310 | 0.607 |

|    |            |       |           |       |            |       |
|----|------------|-------|-----------|-------|------------|-------|
| 82 | Lsmp010410 | 0.594 | MWSslk183 | 0.592 | Lsmp010410 | 0.585 |
| 83 | MW0138670  | 0.5   | MW0138670 | 0.502 | MW0138670  | 0.502 |

---
